# Supplementary material for: An exploration of causal relationships between nine neurological diseases and the risk of breast cancer: a Mendelian randomization study
Source: publisher site journal article supplement (doi:10.18632/aging.205745), 2024-04-24
Supplement: Supplementary file [file aging-v16i8-205745-supplementary-material-SD1.pdf]

SUPPLEMENTARY FIGURES

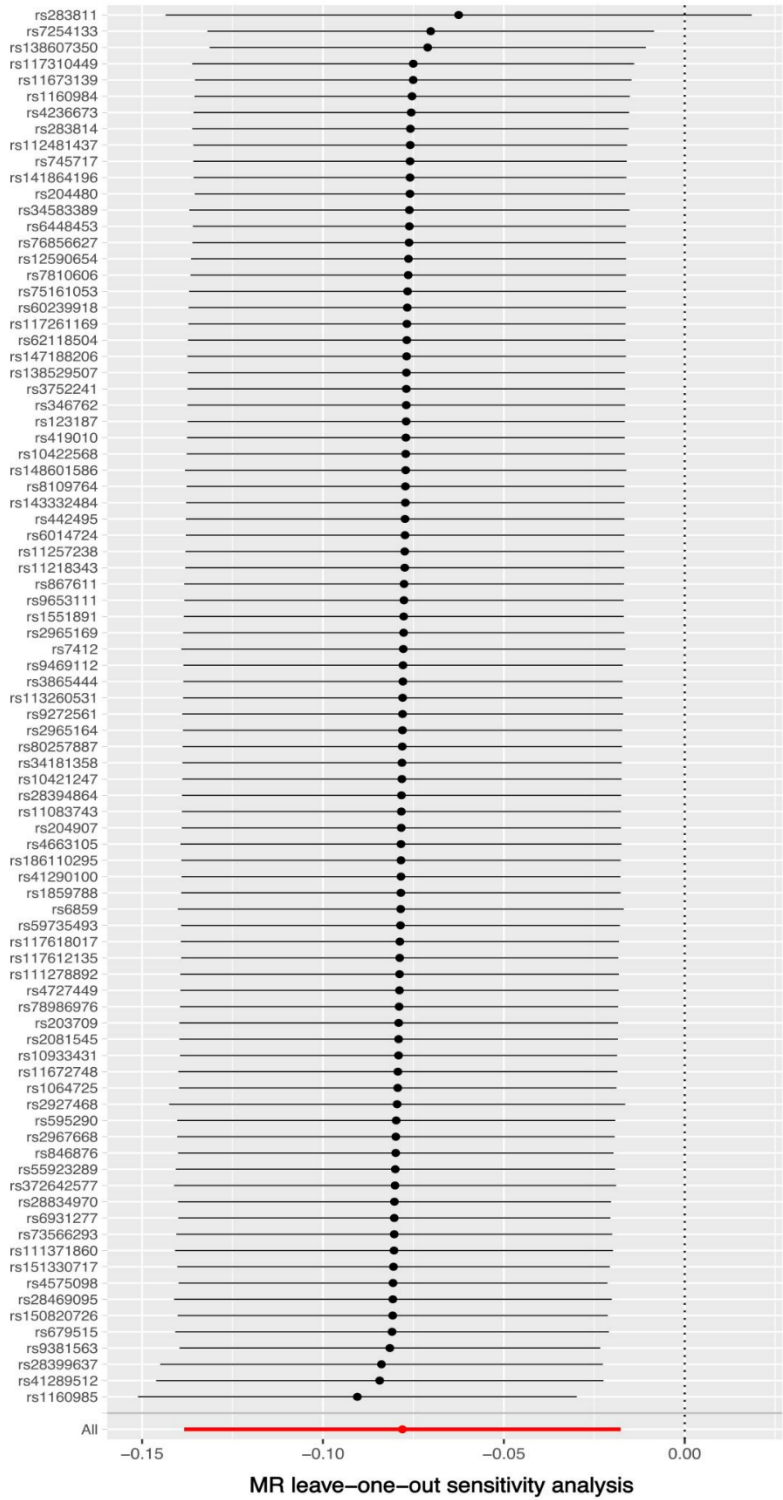

Supplementary Figure 1. Leave-one-out analysis of Alzheimer’s disease and overall breast cancer risk.

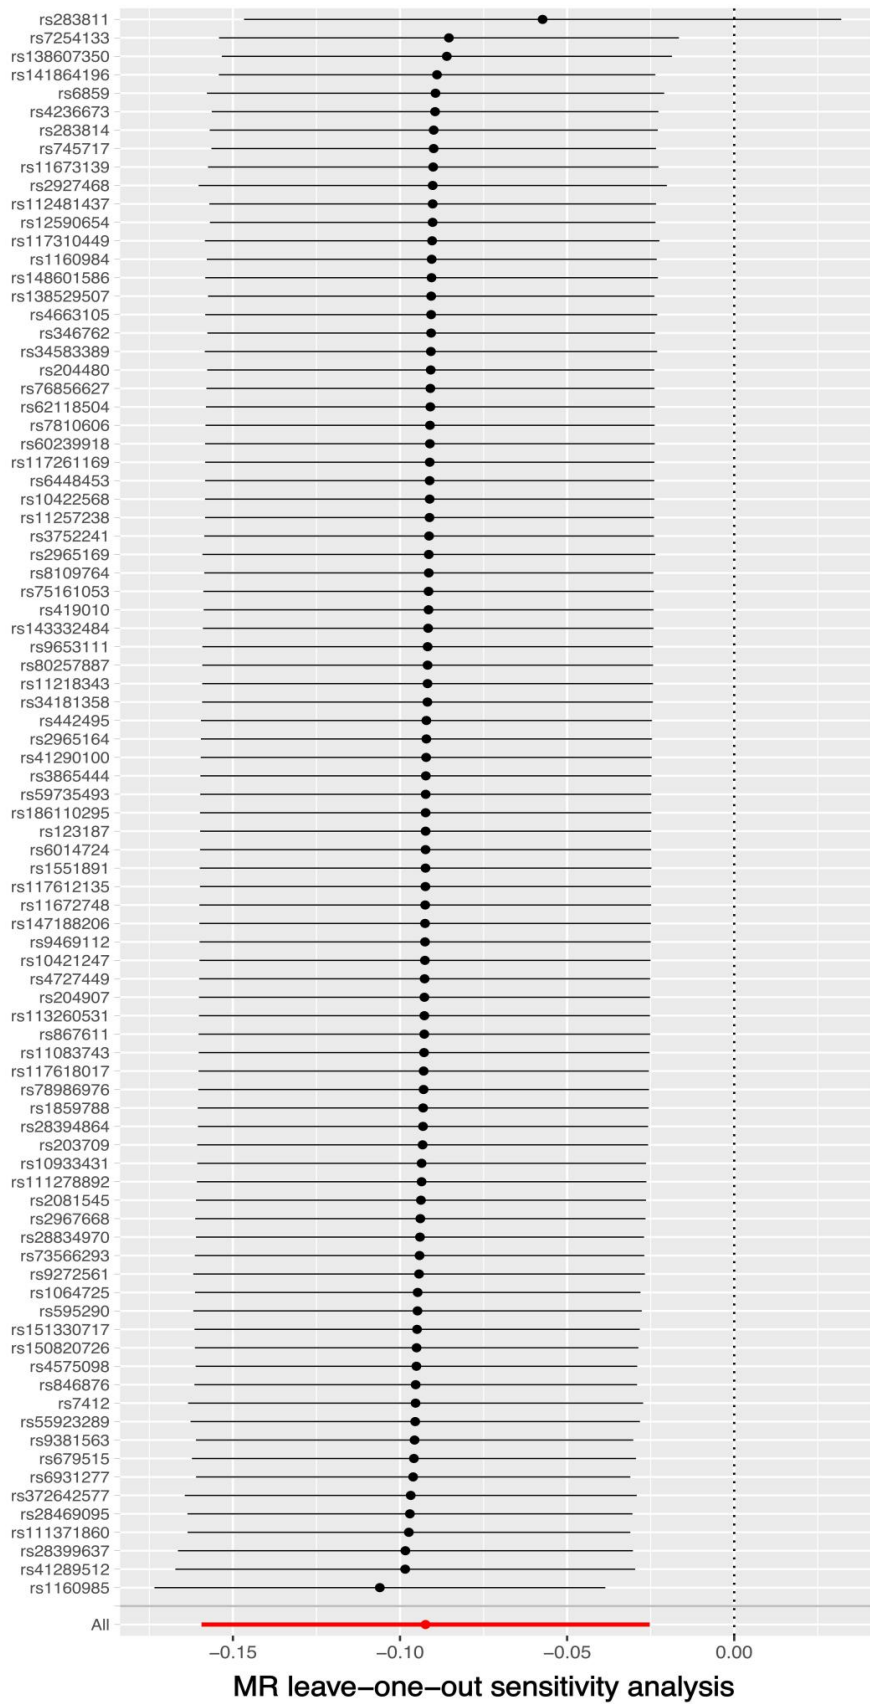

Supplementary Figure 2. Leave-one-out analysis of Alzheimer's disease and ER+ breast cancer risk.

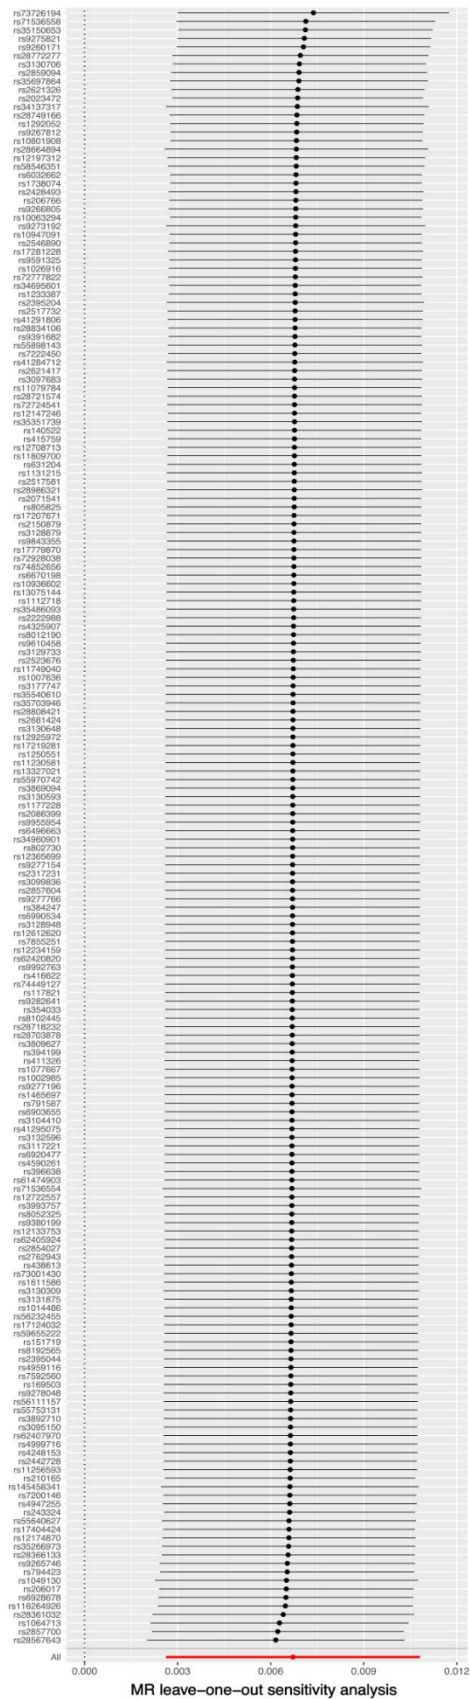

Supplementary Figure 3. Leave-one-out analysis of multiple sclerosis and ER+ breast cancer risk.
