# Supplementary material for: An exploration of causal relationships between nine neurological diseases and the risk of breast cancer: a Mendelian randomization study
Source: publisher site journal article supplement (doi:10.18632/aging.205745), 2024-04-24
Supplement: Supplementary file [file aging-v16i8-205745-supplementary-material-SD2.pdf]

## SUPPLEMENTARY TABLES

**Supplementary Table 1. Detailed information on GWAS data for neurological disease.**

| Neurological disease      | Year | Sample size | Consortium                                            | Link                                                                                                                                                          |
|---------------------------|------|-------------|-------------------------------------------------------|---------------------------------------------------------------------------------------------------------------------------------------------------------------|
| Alzheimer's disease       | 2019 | 455258      | Complex Trait Genetics lab                            | <a href="https://pubmed.ncbi.nlm.nih.gov/30617256/">https://pubmed.ncbi.nlm.nih.gov/30617256/</a>                                                             |
| Multiple sclerosis        | 2019 | 115803      | International Multiple Sclerosis Genetics Consortium  | <a href="https://gwas.mrcieu.ac.uk/datasets/ieu-b-18/">https://gwas.mrcieu.ac.uk/datasets/ieu-b-18/</a>                                                       |
| Parkinson's disease       | 2019 | 482730      | International Parkinson's Disease Genomics Consortium | <a href="https://gwas.mrcieu.ac.uk/datasets/ieu-b-7/">https://gwas.mrcieu.ac.uk/datasets/ieu-b-7/</a>                                                         |
| Myasthenia gravis         | 2021 | 217288      | FinnGen consortium                                    | <a href="https://gwas.mrcieu.ac.uk/datasets/finn-b-G6_MYASTHENIA/">https://gwas.mrcieu.ac.uk/datasets/finn-b-G6_MYASTHENIA/</a>                               |
| Generalized epilepsy      | 2021 | 214313      | FinnGen consortium                                    | <a href="https://gwas.mrcieu.ac.uk/datasets/finn-b-GE/">https://gwas.mrcieu.ac.uk/datasets/finn-b-GE/</a>                                                     |
| Intracerebral haemorrhage | 2021 | 202833      | FinnGen consortium                                    | <a href="https://gwas.mrcieu.ac.uk/datasets/finn-b-I9_ICH/">https://gwas.mrcieu.ac.uk/datasets/finn-b-I9_ICH/</a>                                             |
| Cerebral atherosclerosis  | 2021 | 203172      | FinnGen consortium                                    | <a href="https://gwas.mrcieu.ac.uk/datasets/finn-b-I9_CERATHER/">https://gwas.mrcieu.ac.uk/datasets/finn-b-I9_CERATHER/</a>                                   |
| Brain glioblastoma        | 2021 | 218792      | FinnGen consortium                                    | <a href="https://gwas.mrcieu.ac.uk/datasets/finn-b-C3_GBM/">https://gwas.mrcieu.ac.uk/datasets/finn-b-C3_GBM/</a>                                             |
| Benign meningeal tumor    | 2021 | 218792      | FinnGen consortium                                    | <a href="https://gwas.mrcieu.ac.uk/datasets/finn-b-CD2_BENIGN_MENINGES_CEREBRAL/">https://gwas.mrcieu.ac.uk/datasets/finn-b-CD2_BENIGN_MENINGES_CEREBRAL/</a> |

**Supplementary Table 2. Detailed information on GWAS data for breast cancer.**

| Outcome               | Year | Sample size | Consortium                           | Link                                                                                                        |
|-----------------------|------|-------------|--------------------------------------|-------------------------------------------------------------------------------------------------------------|
| Overall breast cancer | 2017 | 106776      | Breast Cancer Association Consortium | <a href="https://gwas.mrcieu.ac.uk/datasets/ieu-a-1129/">https://gwas.mrcieu.ac.uk/datasets/ieu-a-1129/</a> |
| ER+ breast cancer     | 2017 | 83691       | Breast Cancer Association Consortium | <a href="https://gwas.mrcieu.ac.uk/datasets/ieu-a-1132/">https://gwas.mrcieu.ac.uk/datasets/ieu-a-1132/</a> |
| ER- breast cancer     | 2017 | 55149       | Breast Cancer Association Consortium | <a href="https://gwas.mrcieu.ac.uk/datasets/ieu-a-1135/">https://gwas.mrcieu.ac.uk/datasets/ieu-a-1135/</a> |

**Supplementary Table 3. The MR analyses of neurological diseases and ER+ breast cancer risk from MR Egger and weighted median methods.**

| Neurological diseases     | Used SNPs | MR Egger           |            | Weighted median    |            | $P_{\text{heterogeneity}}$ | $P_{\text{pleiotropy}}$ |
|---------------------------|-----------|--------------------|------------|--------------------|------------|----------------------------|-------------------------|
|                           |           | OR(95% CI)         | $P$ -value | OR(95% CI)         | $P$ -value |                            |                         |
| Alzheimer's disease       | 86        | 0.884(0.809-0.965) | 0.007      | 0.875(0.802-0.954) | 0.003      | 0.100                      | 0.284                   |
| Multiple sclerosis        | 192       | 1.006(1.001-1.012) | 0.019      | 1.005(0.999-1.011) | 0.113      | 0.061                      | 0.791                   |
| Parkinson's disease       | 25        | 1.046(0.942-1.162) | 0.406      | 1.028(0.978-1.081) | 0.273      | 0.006                      | 0.525                   |
| Myasthenia gravis         | 8         | 0.991(0.968-1.015) | 0.504      | 0.996(0.976-1.018) | 0.742      | 0.199                      | 0.190                   |
| Generalized epilepsy      | 12        | 1.010(0.978-1.043) | 0.554      | 0.998(0.969-1.029) | 0.908      | 0.718                      | 0.097                   |
| Intracerebral haemorrhage | 5         | 1.005(0.940-1.075) | 0.891      | 1.031(0.977-1.087) | 0.265      | 0.409                      | 0.728                   |
| Cerebral atherosclerosis  | 7         | 1.005(0.995-1.015) | 0.401      | 1.004(0.995-1.013) | 0.358      | 0.379                      | 0.755                   |
| Brain glioblastoma        | 8         | 0.993(0.975-1.012) | 0.508      | 0.995(0.983-1.006) | 0.351      | 0.078                      | 0.659                   |
| Benign meningeal tumor    | 12        | 0.994(0.960-1.029) | 0.742      | 1.008(0.980-1.038) | 0.572      | 0.107                      | 0.266                   |

**Supplementary Table 4. The MR analyses of neurological diseases and ER- breast cancer risk from MR Egger and weighted median methods.**

| Neurological diseases     | Used SNPs | MR Egger           |                 | Weighted median    |                 | $P_{\text{heterogeneity}}$ | $P_{\text{pleiotropy}}$ |
|---------------------------|-----------|--------------------|-----------------|--------------------|-----------------|----------------------------|-------------------------|
|                           |           | OR(95% CI)         | <i>P</i> -value | OR(95% CI)         | <i>P</i> -value |                            |                         |
| Alzheimer's disease       | 86        | 0.978(0.852-1.123) | 0.756           | 0.981(0.854-1.126) | 0.783           | 0.194                      | 0.921                   |
| Multiple sclerosis        | 192       | 0.998(0.990-1.006) | 0.608           | 0.996(0.987-1.006) | 0.455           | 0.081                      | 0.709                   |
| Parkinson's disease       | 26        | 1.013(0.890-1.153) | 0.848           | 1.033(0.963-1.108) | 0.361           | 0.285                      | 0.939                   |
| Myasthenia gravis         | 8         | 1.020(0.980-1.062) | 0.372           | 1.013(0.983-1.044) | 0.406           | 0.212                      | 0.558                   |
| Generalized epilepsy      | 12        | 1.029(0.961-1.101) | 0.432           | 1.018(0.967-1.071) | 0.499           | 0.089                      | 0.858                   |
| Intracerebral haemorrhage | 5         | 1.072(0.975-1.179) | 0.245           | 1.065(0.982-1.154) | 0.129           | 0.976                      | 0.834                   |
| Cerebral atherosclerosis  | 7         | 1.006(0.991-1.020) | 0.487           | 1.003(0.988-1.017) | 0.714           | 0.796                      | 0.561                   |
| Brain glioblastoma        | 8         | 0.992(0.971-1.014) | 0.493           | 0.999(0.982-1.017) | 0.936           | 0.569                      | 0.330                   |
| Benign meningeal tumor    | 12        | 1.006(0.960-1.053) | 0.817           | 1.010(0.966-1.056) | 0.666           | 0.840                      | 0.952                   |
